# Supplementary material for: Diagnostic intervals before and after implementation of cancer patient pathways – a GP survey and registry based comparison of three cohorts of cancer patients
Source: BMC Cancer. 2015 Apr 23;15:308. doi: 10.1186/s12885-015-1317-7 (PMC4412104; doi:10.1186/s12885-015-1317-7)
Supplement: Additional file 1: — Estimated differences in diagnostic intervals (DIs) after and during CPP implementation compared to before, by cancer type. [file 12885_2015_1317_MOESM1_ESM.pdf]

**Additional file: Estimated differences in diagnostic intervals (DIs) after and during CPP implementation compared to before, by cancer type.**

**Table A: Colorectal cancer:** Estimated differences in diagnostic interval (DI) (calendar days) during and after the implementation of CPPs compared to before the implementation (Model 1). In addition, estimates are shown according to referral route after the implementation: to a CPP (after-CPP) or not (after-no CPP) (Model 2).

Estimates with 95% confidence intervals (95%CI) are displayed for the 25<sup>th</sup>, the 50<sup>th</sup>, the 75<sup>th</sup> percentile and the 90<sup>th</sup> percentiles. Bold estimates indicate statistical significance at p=0.05 level or less. (N=1,760)

|                 | Model 1 <sup>1</sup> |                     | Model 2 <sup>1</sup> – after-group split by referral to a CPP or not |                         |                       |                         |
|-----------------|----------------------|---------------------|----------------------------------------------------------------------|-------------------------|-----------------------|-------------------------|
|                 | during vs. before    | after vs. before    | after-CPP vs. before                                                 | after-no CPP vs. before | After-CPP vs. during  | After-no CPP vs. during |
|                 | Estimate (95%CI)     | Estimate (95%CI)    | Estimate (95%CI)                                                     | Estimate (95%CI)        | Estimate (95%CI)      | Estimate (95%CI)        |
| 25th percentile | <b>-8</b> (-11;-5)   | <b>-10</b> (-12;-7) | <b>-14</b> (-17;-11)                                                 | <b>-6</b> (-10;-3)      | <b>-10</b> (-14;-6)   | 0 (-3;4)                |
| 50th percentile | <b>-13</b> (-31;4)   | <b>-18</b> (-31;-5) | <b>-23</b> (-37;-9)                                                  | -10 (-30;9)             | <b>-15</b> (-25;-6)   | 1 (-6;8)                |
| 75th percentile | <b>-12</b> (-19;-6)  | <b>-23</b> (-42;-4) | <b>-45</b> (-60;-31)                                                 | -10 (-23;3)             | <b>-38</b> (-53;-23)  | 1 (-15;17)              |
| 90th percentile | -4 (-122;115)        | 8 (-194;209)        | <b>-79</b> (-126;-32)                                                | 18 (-37;73)             | <b>-73</b> (-105;-41) | <b>27</b> (1;54)        |

Model 1 reference: before implementation group, cohort, female, 45 years of age, cancer sites, no co-morbidity, high disposable income and high educational level.

Model 2 = model 1, but with after group split by referral route (CPP).

<sup>1</sup> adjusted for gender, age, cancer site, co-morbidity, educational level and disposable income

**Table B: Lung cancer:** Estimated differences in diagnostic interval (DI) (calendar days) during and after the implementation of CPPs compared to before the implementation (Model 1). In addition, estimates are shown according to referral route after the implementation: to a CPP (after-CPP) or not (after-no CPP) (Model 2).

Estimates with 95% confidence intervals (95%CI) are displayed for the 25<sup>th</sup>, the 50<sup>th</sup>, the 75<sup>th</sup> percentile and the 90<sup>th</sup> percentiles. Bold estimates indicate statistical significance at p=0.05 level or less. (N=1,539)

|                 | Model 1 <sup>1</sup> |                      | Model 2 <sup>1</sup> – after-group split by referral to a CPP or not |                         |                      |                         |
|-----------------|----------------------|----------------------|----------------------------------------------------------------------|-------------------------|----------------------|-------------------------|
|                 | during vs. before    | after vs. before     | after-CPP vs. before                                                 | after-no CPP vs. before | After-CPP vs. during | After-no CPP vs. during |
|                 | Estimate (95%CI)     | Estimate (95%CI)     | Estimate (95%CI)                                                     | Estimate (95%CI)        | Estimate (95%CI)     | Estimate (95%CI)        |
| 25th percentile | <b>-12</b> (-14;-9)  | <b>-11</b> (-13;-9)  | <b>-9</b> (-13;-6)                                                   | <b>-10</b> (-14;-6)     | -2 (-5;1)            | -2 (-10;7)              |
| 50th percentile | <b>-17</b> (-23;-12) | <b>-17</b> (-22;-12) | <b>-21</b> (-25;-16)                                                 | -10 (-20;0)             | <b>-9</b> (-16;-2)   | 7 (-7;21)               |
| 75th percentile | <b>-26</b> (-36;-15) | -18 (-40;3)          | -34 (-74;6)                                                          | -6 (-29;16)             | -15 (-62;32)         | 21 (-40;81)             |
| 90th percentile | -60 (-201;80)        | -31 (-64;2)          | <b>-56</b> (-77;-35)                                                 | -24 (-58;11)            | 0 (-104;105)         | 44 (-18;106)            |

Model 1 reference: before implementation group, cohort, female, 45 years of age, cancer sites, no co-morbidity, high disposable income and high educational level.

Model 2 = model 1, but with after group split by referral route (CPP).

<sup>1</sup> adjusted for gender, age, cancer site, co-morbidity, educational level and disposable income

**Table C: Malignant Melanoma:** Estimated differences in diagnostic interval (DI) (calendar days) during and after the implementation of CPPs compared to before the implementation (Model 1). In addition, estimates are shown according to referral route after the implementation: to a CPP (after-CPP) or not (after-no CPP) (Model 2). Estimates with 95% confidence intervals (95%CI) are displayed for the 25<sup>th</sup>, the 50<sup>th</sup>, the 75<sup>th</sup> percentile and the 90<sup>th</sup> percentiles. Bold estimates indicate statistical significance at p=0.05 level or less. (N=700)

|                 | <b>Model 1<sup>1</sup></b> |                         | <b>Model 2<sup>1</sup> – after-group split by referral to a CPP or not</b> |                                |                             |                                |
|-----------------|----------------------------|-------------------------|----------------------------------------------------------------------------|--------------------------------|-----------------------------|--------------------------------|
|                 | <b>during vs. before</b>   | <b>after vs. before</b> | <b>after-CPP vs. before</b>                                                | <b>after-no CPP vs. before</b> | <b>After-CPP vs. during</b> | <b>After-no CPP vs. during</b> |
|                 | <b>Estimate (95%CI)</b>    | <b>Estimate (95%CI)</b> | <b>Estimate (95%CI)</b>                                                    | <b>Estimate (95%CI)</b>        | <b>Estimate (95%CI)</b>     | <b>Estimate (95%CI)</b>        |
| 25th percentile | -6 (-12;1)                 | <b>-10</b> (-15;-5)     | <b>-15</b> (-17;-12)                                                       | -5 (-10;1)                     | <b>-12</b> (-15;-10)        | 1 (-2;4)                       |
| 50th percentile | -4 (-9;1)                  | <b>-11</b> (-19;-4)     | <b>-21</b> (-27;-15)                                                       | 0 (-11;11)                     | <b>-19</b> (-24;-14)        | 4 (-6;13)                      |
| 75th percentile | 1 (-36;38)                 | -13 (-88;61)            | -36 (-116;45)                                                              | 7 (-102;115)                   | -37 (-94;20)                | 4 (-73;81)                     |
| 90th percentile | <b>-100</b> (-125;-75)     | <b>-109</b> (-122;-95)  | <b>-116</b> (-220;-12)                                                     | -56 (-134;21)                  | -90 (-188;7)                | 0 (-84;85)                     |

Model 1 reference: before implementation group, cohort, female, 45 years of age, cancer sites, no co-morbidity, high disposable income and high educational level.

Model 2 = model 1, but with after group split by referral route (CPP).

<sup>1</sup> adjusted for gender, age, cancer site, co-morbidity, educational level and disposable income

**Table D Breast cancer:** Estimated differences in diagnostic interval (DI) (calendar days) during and after the implementation of CPPs compared to before the implementation (Model 1). In addition, estimates are shown according to referral route after the implementation: to a CPP (after-CPP) or not (after-no CPP) (Model 2). Estimates with 95% confidence intervals (95%CI) are displayed for the 25<sup>th</sup>, the 50<sup>th</sup>, the 75<sup>th</sup> percentile and the 90<sup>th</sup> percentiles. Bold estimates indicate statistical significance at p=0.05 level or less. (N=1,811)

|                 | <b>Model 1<sup>1</sup></b> |                         | <b>Model 2<sup>1</sup> – after-group split by referral to a CPP or not</b> |                                |                             |                                |
|-----------------|----------------------------|-------------------------|----------------------------------------------------------------------------|--------------------------------|-----------------------------|--------------------------------|
|                 | <b>during vs. before</b>   | <b>after vs. before</b> | <b>after-CPP vs. before</b>                                                | <b>after-no CPP vs. before</b> | <b>After-CPP vs. during</b> | <b>After-no CPP vs. during</b> |
|                 | <b>Estimate (95%CI)</b>    | <b>Estimate (95%CI)</b> | <b>Estimate (95%CI)</b>                                                    | <b>Estimate (95%CI)</b>        | <b>Estimate (95%CI)</b>     | <b>Estimate (95%CI)</b>        |
| 25th percentile | <b>-5</b> (-6;-4)          | <b>-9</b> (-10;-7)      | <b>-10</b> (-12;-9)                                                        | -2 (-5;1)                      | <b>-7</b> (-9;-5)           | 3 (-2;7)                       |
| 50th percentile | <b>-11</b> (-14;-8)        | <b>-13</b> (-15;-11)    | <b>-16</b> (-19;-13)                                                       | -4 (-8;0)                      | <b>-9</b> (-13;-5)          | <b>7</b> (1;14)                |
| 75th percentile | <b>-18</b> (-23;-14)       | <b>-17</b> (-20;-13)    | <b>-25</b> (-29;-21)                                                       | -6 (-11;0)                     | <b>-14</b> (-16;-11)        | <b>12</b> (4;20)               |
| 90th percentile | <b>-24</b> (-41;-8)        | <b>-27</b> (-45;-9)     | <b>-42</b> (-52;-32)                                                       | -6 (-27;15)                    | <b>-26</b> (-34;-18)        | 19 (-8;46)                     |

Model 1 reference: before implementation group, cohort, female, 45 years of age, cancer sites, no co-morbidity, high disposable income and high educational level.

Model 2 = model 1, but with after group split by referral route (CPP).

<sup>1</sup> adjusted for gender, age, cancer site, co-morbidity, educational level and disposable income

**Table E Prostate cancer:** Estimated differences in diagnostic interval (DI) (calendar days) during and after the implementation of CPPs compared to before the implementation (Model 1). In addition, estimates are shown according to referral route after the implementation: to a CPP (after-CPP) or not (after-no CPP) (Model 2). Estimates with 95% confidence intervals (95%CI) are displayed for the 25<sup>th</sup>, the 50<sup>th</sup>, the 75<sup>th</sup> percentile and the 90<sup>th</sup> percentiles. Bold estimates indicate statistical significance at p=0.05 level or less. (N=1,553)

|                 | <b>Model 1<sup>1</sup></b> |                         | <b>Model 2<sup>1</sup> – after-group split by referral to a CPP or not</b> |                                |                             |                                |
|-----------------|----------------------------|-------------------------|----------------------------------------------------------------------------|--------------------------------|-----------------------------|--------------------------------|
|                 | <b>during vs. before</b>   | <b>after vs. before</b> | <b>after-CPP vs. before</b>                                                | <b>after-no CPP vs. before</b> | <b>After-CPP vs. during</b> | <b>After-no CPP vs. during</b> |
|                 | <b>Estimate (95%CI)</b>    | <b>Estimate (95%CI)</b> | <b>Estimate (95%CI)</b>                                                    | <b>Estimate (95%CI)</b>        | <b>Estimate (95%CI)</b>     | <b>Estimate (95%CI)</b>        |
| 25th percentile | <b>-11</b> (-18;-4)        | <b>-20</b> (-26;-13)    | <b>-19</b> (-25;-14)                                                       | <b>-16</b> (-22;-9)            | <b>-13</b> (-16;-10)        | <b>-7</b> (-11;-3)             |
| 50th percentile | <b>-19</b> (-27;-10)       | <b>-29</b> (-36;-22)    | <b>-36</b> (-41;-31)                                                       | <b>-22</b> (-30;-13)           | <b>-25</b> (-30;-19)        | <b>-5</b> (-11;0)              |
| 75th percentile | <b>-34</b> (-63;-6)        | <b>-43</b> (-56;-30)    | <b>-73</b> (-98;-49)                                                       | <b>-2</b> (-85;81)             | <b>-52</b> (-81;-23)        | <b>32</b> (-54;119)            |
| 90th percentile | <b>-102</b> (-152;-53)     | <b>-29</b> (-106;48)    | <b>-244</b> (-474;-15)                                                     | <b>194</b> (-317;706)          | <b>-195</b> (-298;-91)      | <b>305</b> (65;545)            |

Model 1 reference: before implementation group, cohort, female, 45 years of age, cancer sites, no co-morbidity, high disposable income and high educational level.

Model 2 = model 1, but with after group split by referral route (CPP).

<sup>1</sup> adjusted for gender, age, cancer site, co-morbidity, educational level and disposable income

**Table F Other cancer sites combined:** Estimated differences in diagnostic interval (DI) (calendar days) during and after the implementation of CPPs compared to before the implementation (Model 1). In addition, estimates are shown according to referral route after the implementation: to a CPP (after-CPP) or not (after-no CPP) (Model 2). Estimates with 95% confidence intervals (95%CI) are displayed for the 25<sup>th</sup>, the 50<sup>th</sup>, the 75<sup>th</sup> percentile and the 90<sup>th</sup> percentiles. Bold estimates indicate statistical significance at p=0.05 level or less. (N=4,277)

|                 | <b>Model 1<sup>1</sup></b> |                         | <b>Model 2<sup>1</sup> – after-group split by referral to a CPP or not</b> |                                |                             |                                |
|-----------------|----------------------------|-------------------------|----------------------------------------------------------------------------|--------------------------------|-----------------------------|--------------------------------|
|                 | <b>during vs. before</b>   | <b>after vs. before</b> | <b>after-CPP vs. before</b>                                                | <b>after-no CPP vs. before</b> | <b>After-CPP vs. during</b> | <b>After-no CPP vs. during</b> |
|                 | <b>Estimate (95%CI)</b>    | <b>Estimate (95%CI)</b> | <b>Estimate (95%CI)</b>                                                    | <b>Estimate (95%CI)</b>        | <b>Estimate (95%CI)</b>     | <b>Estimate (95%CI)</b>        |
| 25th percentile | <b>-4</b> (-7;-1)          | <b>-6</b> (-9;-3)       | <b>-11</b> (-15;-6)                                                        | <b>-4</b> (-7;-1)              | <b>-8</b> (-13;-3)          | <b>0</b> (-3;4)                |
| 50th percentile | <b>-12</b> (-19;-5)        | <b>-13</b> (-19;-7)     | <b>-22</b> (-27;-16)                                                       | <b>-7</b> (-15;1)              | <b>-15</b> (-20;-9)         | <b>3</b> (-4;11)               |
| 75th percentile | <b>-21</b> (-80;39)        | <b>-28</b> (-80;24)     | <b>-54</b> (-66;-43)                                                       | <b>-15</b> (-26;-5)            | <b>-42</b> (-54;-29)        | <b>6</b> (-4;15)               |
| 90th percentile | <b>-59</b> (-148;29)       | <b>-49</b> (-78;-20)    | <b>-150</b> (-187;-114)                                                    | <b>-14</b> (-49;20)            | <b>-121</b> (-159;-83)      | <b>44</b> (14;74)              |

Model 1 reference: before implementation group, cohort, female, 45 years of age, cancer sites, no co-morbidity, high disposable income and high educational level.

Model 2 = model 1, but with after group split by referral route (CPP).

<sup>1</sup> adjusted for gender, age, cancer site, co-morbidity, educational level and disposable income
